# Supplementary material
Source: publisher figshare collection journal article supplement (https://springernature.figshare.com/ndownloader/files/12359993)
Supplement: Supplementary file 1 [file 12359993]

## Sheet: critical appraisal
		TABLE S3: Critical Appraisal													contextual social information			site information
Doc ID	Pub year	Title	study type (qualitative/quantitative/mixed)	study length	1 = yes 0.5 = unclear 0 = no	Does the study compare relavant subject, exposures, comparators and outcomes of interest?	Is the duration of the study adequate for the outcomes obtained?	Is the sample size clearly explained and adequate for the study?	Are the data collection methods clearly explained and replicable?	Is the qualitative or quantitative analysis clearly explained and replicable?	Are the results and conclusions logical derived from the data obtained?	Are confounding factors discussed and explained?	Assessment 1 6-7 = high quality 4-5 = medium below 4 = low	1 = yes 0.5 = unclear 0 = no	Is the historical context of the study presented?	Is the ecological context of the study presented?	Is the political context of the study presented?	Is information provided on the study site's soil?	Is information provided on the study site's climate?	Is seasonality taken into account?	Is vegetation of the site documented?	Assessment 2 7 - high 5-6 medium 4 below - low	overall rating 13 - 14 = high 9 - 12 = medium 6 - 8.5 = low 0 - 5.5 = very low (exclude)	Notes
103	2012	Title sample 1	quantitative	1 month		1	1	1	1	1	1	0.5	6.5		0.5	1	0	1	1	1	1	5.5	12	medium
9938	2012	Title sample 2	mixed	6 years		1	0.5	1	0.5	1	1	0.5	5.5		1	0.5	1	0.5	1	0.5	1	5.5	11	medium
1591	2011	Title sample 3	quantitative	4 years		1	0.5	0.5	1	1	1	1	6		1	1	0	1	1	1	1	6	12	medium
2158	2009	Title sample 4	quantitative	data over 4 years		1	1	0	0.5	0.5	0.5	0	3.5		0	0	0	0	0.5	1	0	1.5	5	EXCLUDE, low quality
													0									0	0
													0									0	0
													0									0	0
													0									0	0
													0									0	0
													0									0	0
													0									0	0
													0									0	0
													0									0	0
													0									0	0
													0									0	0
													0									0	0
													0									0	0
													0									0	0
													0									0	0
													0									0	0
													0									0	0
													0									0	0
													0									0	0
													0									0	0
													0									0	0
													0									0	0
													0									0	0
													0									0	0
													0									0	0
													0									0	0
													0									0	0
													0									0	0
													0									0	0
													0									0	0
													0									0	0
													0									0	0
													0									0	0
													0									0	0
													0									0	0
													0									0	0
													0									0	0
													0									0	0
													0									0	0
													0									0	0
													0									0	0
													0									0	0
													0									0	0
													0									0	0
													0									0	0
													0									0	0
													0									0	0
													0									0	0
													0									0	0
													0									0	0
													0									0	0
													0									0	0
													0									0	0
													0									0	0
													0									0	0
													0									0	0
													0									0	0
													0									0	0
													0									0	0
													0									0	0
													0									0	0
													0									0	0
													0									0	0
													0									0	0
													0									0	0
													0									0	0
													0									0	0
													0									0	0
													0									0	0
													0									0	0
													0									0	0
													0									0	0
													0									0	0
													0									0	0
													0									0	0
													0									0	0
													0									0	0
													0									0	0
													0									0	0
